# Supplementary material for: Effects of Captivity on the Morphology of the Insertion Sites of the Palmar Radiocarpal Ligaments in Hominoid Primates
Source: MDPI journal article supplement (doi:10.3390/ani11071856), 2021-06-22
Supplement: s1 [file s1]

**Supplementary Table S1.** Results of the pairwise Mann-Whitney analysis of intra- and inter-observer error. The first number in the heading indicates the number of the observer (observer 1, 2, or 3) and the final number indicates the day the analysis was performed (day 1, 2, or 3).

| 1/PC3/3 | 1/PC2/3 | 1/PC1/3 | 1/PC3/2 | 1/PC2/2 | 1/PC1/2 | 1/PC3/1 | 1/PC2/1 | 1/PC1/1 | 1/PC1/1 |
|---------|---------|---------|---------|---------|---------|---------|---------|---------|---------|
| 0.9506  | 0.9992  | 0.9962  | 0.9445  | 0.9855  | 0.9992  | 0.9445  | 0.9855  |         | 1/PC1/1 |
| 0.9082  | 0.981   | 0.9112  | 0.9855  | 0.9992  | 0.9855  | 0.9855  |         | 0.9855  | 1/PC2/1 |
| 0.9384  | 0.9688  | 0.89    | 0.9992  | 0.9855  | 0.9445  |         | 0.9855  | 0.9445  | 1/PC3/1 |
| 0.9506  | 0.9992  | 0.9962  | 0.9445  | 0.9855  |         | 0.9445  | 0.9855  | 0.9992  | 1/PC1/2 |
| 0.9082  | 0.981   | 0.9112  | 0.9855  |         | 0.9855  | 0.9855  | 0.9992  | 0.9855  | 1/PC2/2 |
| 0.9384  | 0.9688  | 0.89    |         | 0.9855  | 0.9445  | 0.9992  | 0.9855  | 0.9445  | 1/PC3/2 |
| 0.9142  | 0.8705  |         | 0.89    | 0.9112  | 0.9962  | 0.89    | 0.9112  | 0.9962  | 1/PC1/3 |
| 0.8915  |         | 0.8705  | 0.9688  | 0.981   | 0.9992  | 0.9688  | 0.981   | 0.9992  | 1/PC2/3 |
|         | 0.8915  | 0.9142  | 0.9384  | 0.9082  | 0.9506  | 0.9384  | 0.9082  | 0.9506  | 1/PC3/3 |
| 0.7756  | 0.7814  | 0.9992  | 0.7393  | 0.7494  | 0.984   | 0.7393  | 0.7494  | 0.984   | 2/PC1/1 |
| 0.8976  | 0.9795  | 0.8615  | 0.9203  | 0.9673  | 0.9962  | 0.9203  | 0.9673  | 0.9962  | 2/PC2/1 |
| 0.6895  | 0.8585  | 0.9278  | 0.7873  | 0.872   | 0.9855  | 0.7873  | 0.872   | 0.9855  | 2/PC3/1 |
| 0.7683  | 0.7991  | 0.9992  | 0.7844  | 0.8212  | 0.9734  | 0.7844  | 0.8212  | 0.9734  | 2/PC1/2 |
| 0.984   | 0.9734  | 0.8735  | 0.9992  | 0.9688  | 0.9992  | 0.9992  | 0.9688  | 0.9992  | 2/PC2/2 |
| 0.946   | 0.9445  | 0.8735  | 0.946   | 0.9339  | 0.943   | 0.946   | 0.9339  | 0.943   | 2/PC3/2 |
| 0.9688  | 0.981   | 0.9779  | 0.9734  | 0.9491  | 0.9992  | 0.9734  | 0.9491  | 0.9992  | 2/PC1/3 |
| 0.851   | 0.9992  | 0.9172  | 0.9127  | 0.9795  | 0.9901  | 0.9127  | 0.9795  | 0.9901  | 2/PC2/3 |
| 0.7814  | 0.9036  | 0.8885  | 0.8227  | 0.9354  | 0.9719  | 0.8227  | 0.9354  | 0.9719  | 2/PC3/3 |
| 0.9491  | 0.9977  | 0.9475  | 0.9475  | 0.9871  | 0.9764  | 0.9475  | 0.9871  | 0.9764  | 3/PC1/1 |
| 0.981   | 0.9536  | 0.8931  | 0.9673  | 0.9324  | 0.9825  | 0.9673  | 0.9324  | 0.9825  | 3/PC2/1 |
| 0.9673  | 0.9962  | 0.9127  | 0.9354  | 0.9977  | 0.9703  | 0.9354  | 0.9977  | 0.9703  | 3/PC3/1 |
| 0.9157  | 0.89    | 0.9779  | 0.9021  | 0.9218  | 0.9551  | 0.9021  | 0.9218  | 0.9551  | 3/PC1/2 |
| 0.9521  | 0.9369  | 0.9006  | 0.9749  | 0.8946  | 0.9901  | 0.9749  | 0.8946  | 0.9901  | 3/PC2/2 |
| 0.8064  | 0.9536  | 0.9369  | 0.8675  | 0.9855  | 0.9749  | 0.8675  | 0.9855  | 0.9749  | 3/PC3/2 |
| 0.842   | 0.851   | 0.9612  | 0.863   | 0.8615  | 0.9855  | 0.863   | 0.8615  | 0.9855  | 3/PC1/3 |
| 0.9248  | 0.8465  | 0.9172  | 0.8931  | 0.8585  | 0.9916  | 0.8931  | 0.8585  | 0.9916  | 3/PC2/3 |
| 0.9354  | 0.9932  | 0.8946  | 0.9764  | 0.9384  | 0.9734  | 0.9764  | 0.9384  | 0.9734  | 3/PC3/3 |

| 3/PC3/1 | 3/PC2/1 | 3/PC1/1 | 2/PC3/3 | 2/PC2/3 | 2/PC1/3 | 2/PC3/2 | 2/PC2/2 | 2/PC1/2 | 2/PC3/1 | 2/PC2/1 | 2/PC1/1 |
|---------|---------|---------|---------|---------|---------|---------|---------|---------|---------|---------|---------|
| 0.9703  | 0.9825  | 0.9764  | 0.9719  | 0.9901  | 0.9992  | 0.943   | 0.9992  | 0.9734  | 0.9855  | 0.9962  | 0.984   |
| 0.9977  | 0.9324  | 0.9871  | 0.9354  | 0.9795  | 0.9491  | 0.9339  | 0.9688  | 0.8212  | 0.872   | 0.9673  | 0.7494  |
| 0.9354  | 0.9673  | 0.9475  | 0.8227  | 0.9127  | 0.9734  | 0.946   | 0.9992  | 0.7844  | 0.7873  | 0.9203  | 0.7393  |
| 0.9703  | 0.9825  | 0.9764  | 0.9719  | 0.9901  | 0.9992  | 0.943   | 0.9992  | 0.9734  | 0.9855  | 0.9962  | 0.984   |
| 0.9977  | 0.9324  | 0.9871  | 0.9354  | 0.9795  | 0.9491  | 0.9339  | 0.9688  | 0.8212  | 0.872   | 0.9673  | 0.7494  |
| 0.9354  | 0.9673  | 0.9475  | 0.8227  | 0.9127  | 0.9734  | 0.946   | 0.9992  | 0.7844  | 0.7873  | 0.9203  | 0.7393  |
| 0.9127  | 0.8931  | 0.9475  | 0.8885  | 0.9172  | 0.9779  | 0.8735  | 0.8735  | 0.9992  | 0.9278  | 0.8615  | 0.9992  |
| 0.9962  | 0.9536  | 0.9977  | 0.9036  | 0.9992  | 0.981   | 0.9445  | 0.9734  | 0.7991  | 0.8585  | 0.9795  | 0.7814  |
| 0.9673  | 0.981   | 0.9491  | 0.7814  | 0.851   | 0.9688  | 0.946   | 0.984   | 0.7683  | 0.6895  | 0.8976  | 0.7756  |
| 0.7523  | 0.78    | 0.9658  | 0.7221  | 0.725   | 0.9309  | 0.7509  | 0.7697  | 0.9871  | 0.7065  | 0.761   |         |
| 0.9779  | 0.8885  | 0.9612  | 0.9551  | 0.9901  | 0.9886  | 0.9324  | 0.9932  | 0.8109  | 0.9688  |         | 0.761   |
| 0.8495  | 0.7858  | 0.9779  | 0.9354  | 0.8735  | 0.9688  | 0.7193  | 0.7991  | 0.7683  |         | 0.9688  | 0.7065  |
| 0.78    | 0.842   | 0.94    | 0.7581  | 0.7697  | 0.9218  | 0.8064  | 0.8123  |         | 0.7683  | 0.8109  | 0.9871  |
| 0.9354  | 0.984   | 0.9916  | 0.8525  | 0.9567  | 0.9643  | 0.9734  |         | 0.8123  | 0.7991  | 0.9932  | 0.7697  |
| 0.9369  | 0.9627  | 0.8946  | 0.7873  | 0.8555  | 0.984   |         | 0.9734  | 0.8064  | 0.7193  | 0.9324  | 0.7509  |
| 0.9779  | 0.9734  | 0.9612  | 0.9992  | 0.9536  |         | 0.984   | 0.9643  | 0.9218  | 0.9688  | 0.9886  | 0.9309  |
| 0.9521  | 0.9036  | 0.9932  | 0.9218  |         | 0.9536  |         | 0.9567  | 0.7697  | 0.8735  | 0.9901  | 0.725   |
| 0.8765  | 0.8765  | 0.9293  |         | 0.9218  | 0.9992  | 0.8555  | 0.8525  | 0.7581  | 0.9354  | 0.9551  | 0.7221  |
| 0.9795  | 0.9734  |         | 0.9293  | 0.9932  | 0.9612  | 0.8946  | 0.9916  | 0.94    | 0.9779  | 0.9612  | 0.9658  |
| 0.9066  |         | 0.9734  | 0.8765  | 0.9036  | 0.9734  | 0.9627  | 0.984   | 0.842   | 0.7858  | 0.8885  | 0.78    |
|         | 0.9066  | 0.9795  | 0.8765  | 0.9521  | 0.9779  | 0.9369  | 0.9354  | 0.78    | 0.8495  | 0.9779  | 0.7523  |
| 0.9066  | 0.9218  | 0.9673  | 0.8645  | 0.9112  | 0.981   | 0.9203  | 0.8991  | 0.9369  | 0.9021  | 0.9293  | 0.9112  |
| 0.8615  | 0.946   | 0.9855  | 0.7946  | 0.8825  | 0.9506  | 0.9582  | 0.9354  | 0.7946  | 0.7393  | 0.9324  | 0.7639  |
| 0.9172  | 0.8257  | 0.9597  | 0.9627  | 0.878   | 0.9977  | 0.8406  | 0.8495  | 0.7917  | 0.9066  | 0.984   | 0.7221  |
| 0.854   | 0.9006  | 0.9491  | 0.8346  | 0.878   | 0.9673  | 0.875   | 0.8376  | 0.9703  | 0.869   | 0.872   | 0.9992  |
| 0.8079  | 0.8946  | 0.9855  | 0.761   | 0.8645  | 0.9947  | 0.8765  | 0.8331  | 0.8361  | 0.6811  | 0.845   | 0.7858  |
| 0.9506  | 0.943   | 0.9415  | 0.845   | 0.9082  | 0.9764  | 0.981   | 0.9962  | 0.7932  | 0.7581  | 0.9248  | 0.7581  |

| 3/PC3/3 | 3/PC2/3 | 3/PC1/3 | 3/PC3/2 | 3/PC2/2 | 3/PC1/2 |
|---------|---------|---------|---------|---------|---------|
| 0.9734  | 0.9916  | 0.9855  | 0.9749  | 0.9901  | 0.9551  |
| 0.9384  | 0.8585  | 0.8615  | 0.9855  | 0.8946  | 0.9218  |
| 0.9764  | 0.8931  | 0.863   | 0.8675  | 0.9749  | 0.9021  |
| 0.9734  | 0.9916  | 0.9855  | 0.9749  | 0.9901  | 0.9551  |
| 0.9384  | 0.8585  | 0.8615  | 0.9855  | 0.8946  | 0.9218  |
| 0.9764  | 0.8931  | 0.863   | 0.8675  | 0.9749  | 0.9021  |
| 0.8946  | 0.9172  | 0.9612  | 0.9369  | 0.9006  | 0.9779  |
| 0.9932  | 0.8465  | 0.851   | 0.9536  | 0.9369  | 0.89    |
| 0.9354  | 0.9248  | 0.842   | 0.8064  | 0.9521  | 0.9157  |
| 0.7581  | 0.7858  | 0.9992  | 0.7221  | 0.7639  | 0.9112  |
| 0.9248  | 0.845   | 0.872   | 0.984   | 0.9324  | 0.9293  |
| 0.7581  | 0.6811  | 0.869   | 0.9066  | 0.7393  | 0.9021  |
| 0.7932  | 0.8361  | 0.9703  | 0.7917  | 0.7946  | 0.9369  |
| 0.9962  | 0.8331  | 0.8376  | 0.8495  | 0.9354  | 0.8991  |
| 0.981   | 0.8765  | 0.875   | 0.8406  | 0.9582  | 0.9203  |
| 0.9764  | 0.9947  | 0.9673  | 0.9977  | 0.9506  | 0.981   |
| 0.9082  | 0.8645  | 0.878   | 0.878   | 0.8825  | 0.9112  |
| 0.845   | 0.761   | 0.8346  | 0.9627  | 0.7946  | 0.8645  |
| 0.9415  | 0.9855  | 0.9491  | 0.9597  | 0.9855  | 0.9673  |
| 0.943   | 0.8946  | 0.9006  | 0.8257  | 0.946   | 0.9218  |
| 0.9506  | 0.8079  | 0.854   | 0.9172  | 0.8615  | 0.9066  |
| 0.9112  | 0.8976  | 0.9779  | 0.9203  | 0.9278  |         |
| 0.9339  | 0.9597  | 0.8946  | 0.7465  |         | 0.9278  |
| 0.845   | 0.6783  | 0.8495  |         | 0.7465  | 0.9203  |
| 0.875   | 0.9278  |         | 0.8495  | 0.8946  | 0.9779  |
| 0.872   |         | 0.9278  | 0.6783  | 0.9597  | 0.8976  |
|         | 0.872   | 0.875   | 0.845   | 0.9339  | 0.9112  |
